# Supplementary material for: Demographic and Regional Trends of Mortality in Patients With Aortic Dissection in the United States, 1999 to 2019
Source: PubMed Central journal article supplement — J Am Heart Assoc. 2022 Mar 18;11(7):e024533. doi: 10.1161/JAHA.121.024533 (PMC9075427; doi:10.1161/jaha.121.024533), 2022-03-18
Supplement: JAH3-11-e024533-s001.pdf [file JAH3-11-e024533-s001.pdf]

# **Supplemental Material**

**Table S1. Absolute Number of Aortic Dissection Deaths Stratified by Sex and Race/Ethnicity in the United States, 1999-2019.**

| <b>Year</b>  | <b>Overall</b> | <b>Women</b> | <b>Men</b>   | <b>NH White</b> | <b>NH Black or African American</b> | <b>NH Others</b> | <b>Hispanics or Latino</b> |
|--------------|----------------|--------------|--------------|-----------------|-------------------------------------|------------------|----------------------------|
| 1999         | 3745           | 1553         | 2192         | 3014            | 487                                 | 92               | 143                        |
| 2000         | 3844           | 1590         | 2254         | 3035            | 495                                 | 126              | 171                        |
| 2001         | 3749           | 1546         | 2203         | 2960            | 476                                 | 146              | 150                        |
| 2002         | 3772           | 1532         | 2240         | 2970            | 521                                 | 102              | 164                        |
| 2003         | 3964           | 1589         | 2375         | 3085            | 567                                 | 125              | 175                        |
| 2004         | 3721           | 1556         | 2165         | 2864            | 547                                 | 122              | 182                        |
| 2005         | 3868           | 1554         | 2314         | 2927            | 593                                 | 154              | 184                        |
| 2006         | 3957           | 1631         | 2326         | 2963            | 633                                 | 138              | 211                        |
| 2007         | 3960           | 1628         | 2332         | 2939            | 654                                 | 166              | 197                        |
| 2008         | 3780           | 1580         | 2200         | 2853            | 581                                 | 156              | 180                        |
| 2009         | 3940           | 1635         | 2305         | 2892            | 621                                 | 168              | 250                        |
| 2010         | 3891           | 1541         | 2350         | 2861            | 606                                 | 173              | 235                        |
| 2011         | 3895           | 1545         | 2350         | 2849            | 631                                 | 173              | 231                        |
| 2012         | 3920           | 1552         | 2368         | 2906            | 580                                 | 196              | 221                        |
| 2013         | 4067           | 1705         | 2362         | 2956            | 686                                 | 180              | 235                        |
| 2014         | 4371           | 1768         | 2603         | 3159            | 735                                 | 212              | 249                        |
| 2015         | 4442           | 1861         | 2581         | 3217            | 711                                 | 211              | 289                        |
| 2016         | 4608           | 1889         | 2719         | 3319            | 770                                 | 207              | 295                        |
| 2017         | 4854           | 2064         | 2790         | 3473            | 807                                 | 274              | 283                        |
| 2018         | 5126           | 2178         | 2948         | 3618            | 860                                 | 257              | 369                        |
| 2019         | 5381           | 2267         | 3114         | 3755            | 950                                 | 279              | 379                        |
| <b>Total</b> | <b>86855</b>   | <b>35764</b> | <b>51091</b> | <b>64615</b>    | <b>13511</b>                        | <b>3657</b>      | <b>4793</b>                |

**Table S2. Trends in Aortic Dissection Mortality Stratified by Location of Death in the United States, 1999-2019.**

| Year         | Medical Facility | Nursing home/Long Term Care | Hospice     | Home         |
|--------------|------------------|-----------------------------|-------------|--------------|
| 1999         | 3193             | 104                         | Missing     | 372          |
| 2000         | 3276             | 125                         | Missing     | 368          |
| 2001         | 3137             | 124                         | Missing     | 396          |
| 2002         | 3169             | 89                          | Missing     | 425          |
| 2003         | 3266             | 89                          | 2           | 465          |
| 2004         | 3028             | 113                         | 0           | 465          |
| 2005         | 3157             | 124                         | 15          | 448          |
| 2006         | 3184             | 112                         | 21          | 515          |
| 2007         | 3172             | 120                         | 34          | 484          |
| 2008         | 2992             | 133                         | 34          | 444          |
| 2009         | 3063             | 114                         | 48          | 514          |
| 2010         | 3041             | 95                          | 57          | 554          |
| 2011         | 3016             | 98                          | 67          | 553          |
| 2012         | 3005             | 107                         | 92          | 585          |
| 2013         | 3127             | 116                         | 83          | 559          |
| 2014         | 3342             | 116                         | 117         | 628          |
| 2015         | 3317             | 136                         | 129         | 710          |
| 2016         | 3481             | 103                         | 135         | 725          |
| 2017         | 3646             | 112                         | 139         | 786          |
| 2018         | 3874             | 99                          | 152         | 801          |
| 2019         | 3983             | 144                         | 160         | 879          |
| <b>Total</b> | <b>68469</b>     | <b>2373</b>                 | <b>1285</b> | <b>11676</b> |

**Table S3. Overall and Sex-Stratified Aortic Dissection Age-Adjusted Mortality Rates per 1,000,000 in the United States, 1999 to 2019.**

| <b>Year</b> | <b>Overall</b> | <b>Male</b> | <b>Female</b> |
|-------------|----------------|-------------|---------------|
| 1999        | 21.11          | 28.56       | 15.14         |
| 2000        | 21.42          | 28.96       | 15.24         |
| 2001        | 20.53          | 27.79       | 14.57         |
| 2002        | 20.3           | 27.39       | 14.33         |
| 2003        | 20.98          | 28.48       | 14.67         |
| 2004        | 19.44          | 25.57       | 14.13         |
| 2005        | 19.77          | 26.47       | 13.85         |
| 2006        | 19.86          | 25.98       | 14.32         |
| 2007        | 19.51          | 25.55       | 14.11         |
| 2008        | 18.28          | 23.61       | 13.38         |
| 2009        | 18.85          | 24.33       | 13.78         |
| 2010        | 18.29          | 24.41       | 12.7          |
| 2011        | 17.8           | 23.62       | 12.49         |
| 2012        | 17.68          | 23.5        | 12.37         |
| 2013        | 18             | 23          | 13.35         |
| 2014        | 18.83          | 24.59       | 13.38         |
| 2015        | 18.88          | 24.04       | 13.88         |
| 2016        | 19.36          | 25.01       | 13.97         |
| 2017        | 19.86          | 25.02       | 14.76         |
| 2018        | 20.61          | 25.9        | 15.38         |
| 2019        | 21.37          | 27.21       | 15.78         |
| Total       | 19.47          | 25.42       | 14.04         |

**Table S4. Aortic dissection age-adjusted mortality rates per 1,000,000 stratified by race in the United States, 1999 to 2019.**

| <b>Year</b>  | <b>NH White</b> | <b>NH Black or African-American</b> | <b>NH Others</b> | <b>Hispanic or Latino</b> |
|--------------|-----------------|-------------------------------------|------------------|---------------------------|
| 1999         | 20.75           | 28.77                               | 17.11            | 13.44                     |
| 2000         | 20.73           | 29.11                               | 22.65            | 15.76                     |
| 2001         | 20.01           | 26.86                               | 25.01            | 12.27                     |
| 2002         | 19.84           | 28.44                               | 15.99            | 13.15                     |
| 2003         | 20.37           | 30                                  | 18.31            | 13.31                     |
| 2004         | 18.8            | 28.83                               | 16.85            | 12.02                     |
| 2005         | 18.88           | 30.14                               | 20.95            | 12.08                     |
| 2006         | 18.91           | 31.65                               | 17.91            | 12.83                     |
| 2007         | 18.54           | 31.08                               | 19.61            | 11.98                     |
| 2008         | 17.75           | 27.25                               | 18.21            | 10.49                     |
| 2009         | 17.88           | 28.76                               | 18.38            | 13.62                     |
| 2010         | 17.46           | 27.27                               | 18.46            | 11.78                     |
| 2011         | 17.01           | 27.75                               | 17.42            | 11.01                     |
| 2012         | 17.3            | 25.08                               | 17.88            | 10.12                     |
| 2013         | 17.33           | 28.59                               | 15.4             | 10.69                     |
| 2014         | 18.07           | 30.13                               | 17.14            | 10.75                     |
| 2015         | 18.29           | 28.69                               | 16.32            | 11.89                     |
| 2016         | 18.82           | 30.41                               | 15.85            | 11.56                     |
| 2017         | 19.23           | 31.11                               | 19.39            | 10.53                     |
| 2018         | 19.85           | 32.84                               | 17.37            | 13.11                     |
| 2019         | 20.33           | 35.79                               | 18.07            | 13.61                     |
| <b>Total</b> | <b>18.78</b>    | <b>29.45</b>                        | <b>17.98</b>     | <b>12.01</b>              |

**Table S5. Aortic dissection crude mortality rates per 1,000,000 stratified by age groups in the United States, 1999 to 2019.**

| <b>Year</b>  | <b>Age 25-39</b> | <b>Age 40-54</b> | <b>Age 55-69</b> | <b>Age 70-84</b> | <b>Age 85+</b> |
|--------------|------------------|------------------|------------------|------------------|----------------|
| 1999         | 3.23             | 10.65            | 29.29            | 70.85            | 106.88         |
| 2000         | 2.75             | 10.86            | 29.49            | 71.64            | 118.41         |
| 2001         | 3.32             | 10.08            | 27.17            | 68.27            | 118.96         |
| 2002         | 2.82             | 10.75            | 27.98            | 67.67            | 103.23         |
| 2003         | 3.32             | 11.96            | 26.8             | 69.18            | 110.83         |
| 2004         | 3.51             | 10.72            | 23.49            | 64.26            | 111.31         |
| 2005         | 3.15             | 11.76            | 25.1             | 62.74            | 111.86         |
| 2006         | 3.27             | 12.59            | 24.6             | 61.39            | 113.85         |
| 2007         | 3.61             | 12.19            | 24.9             | 58.31            | 112.91         |
| 2008         | 3.54             | 11.03            | 23.17            | 55.12            | 108.93         |
| 2009         | 3.51             | 12.3             | 22.97            | 57.08            | 104.15         |
| 2010         | 3.64             | 11.72            | 22.63            | 53.18            | 109.4          |
| 2011         | 3.24             | 11.45            | 23.4             | 49.86            | 107.2          |
| 2012         | 3.54             | 12.19            | 21.36            | 50.21            | 104.12         |
| 2013         | 3.75             | 11.51            | 22.07            | 50.84            | 111.91         |
| 2014         | 3.36             | 12.35            | 25.2             | 51.91            | 111.32         |
| 2015         | 3.8              | 12.14            | 24.57            | 50.66            | 117.86         |
| 2016         | 3.94             | 13.54            | 24.19            | 51.68            | 117.24         |
| 2017         | 3.85             | 13.38            | 25.51            | 51.17            | 132.48         |
| 2018         | 3.85             | 13.63            | 26.77            | 53.99            | 135.53         |
| 2019         | 4.06             | 14.82            | 27.61            | 55.2             | 135.5          |
| <b>Total</b> | <b>3.49</b>      | <b>11.98</b>     | <b>24.97</b>     | <b>57.85</b>     | <b>115.22</b>  |

**Table S6. Aortic dissection age-adjusted mortality rates per 1,000,000 stratified by Urban-Rural classification in the United States, 1999 to 2019.**

| <b>Year</b> | <b>Large Metropolitan</b> | <b>Medium/Small Metropolitan</b> | <b>Rural</b> |
|-------------|---------------------------|----------------------------------|--------------|
| 1999        | 21.41                     | 21.12                            | 20.32        |
| 2000        | 21.85                     | 22.19                            | 18.83        |
| 2001        | 20.84                     | 20.86                            | 19.03        |
| 2002        | 20.48                     | 20.62                            | 19.01        |
| 2003        | 21.24                     | 20.45                            | 20.9         |
| 2004        | 19.49                     | 20.16                            | 17.9         |
| 2005        | 20.12                     | 19.91                            | 18.4         |
| 2006        | 19.51                     | 20.5                             | 19.77        |
| 2007        | 19.67                     | 19.61                            | 18.94        |
| 2008        | 18.36                     | 18.74                            | 17.31        |
| 2009        | 19.01                     | 18.91                            | 18.01        |
| 2010        | 18.01                     | 19.34                            | 16.93        |
| 2011        | 17.67                     | 18.48                            | 16.87        |
| 2012        | 18.03                     | 17.57                            | 16.82        |
| 2013        | 17.9                      | 18.12                            | 17.98        |
| 2014        | 18.55                     | 20.05                            | 17.47        |
| 2015        | 18.49                     | 19.59                            | 19           |
| 2016        | 18.82                     | 20.41                            | 19.17        |
| 2017        | 19.93                     | 19.83                            | 19.69        |
| 2018        | 19.89                     | 21.63                            | 21.15        |
| 2019        | 21.15                     | 21.9                             | 21.17        |
| Total       | 19.45                     | 19.9                             | 18.71        |

**Table S7. State-level Aortic Dissection age-adjusted mortality rates per 1,000,000 people in the United States, 1999 to 2019.**

| <b>State</b>   | <b>Rank</b> | <b>Percentile</b> | <b>Age-adjusted mortality rate per 1,000,000</b> |
|----------------|-------------|-------------------|--------------------------------------------------|
| Massachusetts  | 1           | 0                 | 14.37                                            |
| Mississippi    | 2           | 2                 | 15.58                                            |
| Virginia       | 3           | 4                 | 15.91                                            |
| Kentucky       | 4           | 6                 | 16.05                                            |
| New Jersey     | 5           | 8                 | 16.55                                            |
| Connecticut    | 6           | 10                | 16.59                                            |
| Maine          | 7           | 12                | 16.61                                            |
| Idaho          | 8           | 14                | 16.97                                            |
| New Hampshire  | 9           | 16                | 17.1                                             |
| South Dakota   | 10          | 18                | 17.34                                            |
| Arkansas       | 11          | 20                | 17.46                                            |
| Texas          | 12          | 22                | 17.73                                            |
| Louisiana      | 13          | 24                | 17.94                                            |
| West Virginia  | 14          | 26                | 18.19                                            |
| Florida        | 15          | 28                | 18.22                                            |
| Rhode Island   | 16          | 30                | 18.38                                            |
| New Mexico     | 17          | 32                | 18.56                                            |
| Alabama        | 18          | 34                | 18.78                                            |
| New York       | 19          | 36                | 18.84                                            |
| North Carolina | 20          | 38                | 18.88                                            |
| North Dakota   | 21          | 40                | 19                                               |
| Missouri       | 22          | 42                | 19.24                                            |
| Illinois       | 23          | 44                | 19.27                                            |
| Arizona        | 24          | 46                | 19.32                                            |
| Nebraska       | 25          | 48                | 19.43                                            |
| Pennsylvania   | 26          | 50                | 19.46                                            |
| Maryland       | 27          | 52                | 19.67                                            |
| Wisconsin      | 27          | 52                | 19.67                                            |
| Tennessee      | 29          | 56                | 19.82                                            |
| Georgia        | 30          | 58                | 19.89                                            |
| Oklahoma       | 31          | 60                | 20.26                                            |
| Colorado       | 32          | 62                | 20.55                                            |
| Iowa           | 33          | 64                | 20.69                                            |
| California     | 33          | 64                | 20.69                                            |
| Montana        | 35          | 68                | 20.74                                            |
| Minnesota      | 36          | 70                | 21.09                                            |



|                      |    |     |       |
|----------------------|----|-----|-------|
| Vermont              | 37 | 72  | 21.11 |
| Indiana              | 38 | 74  | 21.34 |
| Utah                 | 39 | 76  | 21.38 |
| Oregon               | 40 | 78  | 21.48 |
| Alaska               | 41 | 80  | 21.54 |
| Wyoming              | 42 | 82  | 21.68 |
| Nevada               | 43 | 84  | 21.93 |
| Ohio                 | 44 | 86  | 22    |
| South Carolina       | 45 | 88  | 22.01 |
| Washington           | 46 | 90  | 22.33 |
| Kansas               | 47 | 92  | 22.71 |
| Delaware             | 48 | 94  | 23.87 |
| Michigan             | 49 | 96  | 23.94 |
| Hawaii               | 50 | 98  | 30.8  |
| District of Columbia | 51 | 100 | 30.9  |

---
